# Supplementary material for: La–Mg mixed oxide as a highly basic water resistant catalyst for utilization of CO2 in the synthesis of quinazoline-2,4(1H,3H)-dione
Source: Royal Society of Chemistry journal article supplement (doi:10.1039/c6ra15802a), 2016-01-01

## Supporting Information

### La-Mg mixed oxide as highly basic water resistant catalyst for utilization of CO<sub>2</sub> in synthesis of quinazoline-2,4(1*H*,3*H*)-dione

Kalidas B. Rasal; Ganapati D. Yadav\*

#### 1. La-Mg MO characterization

The catalyst was fully characterized by different techniques like XRD, FTIR, TGA, SEM, TPD and BET surface area and porosity. The powder XRD were recorded using a Bruker AXS, D8 discover instrument (USA) with Cu-K $\alpha$  (1.54Å) radiation over a range of 10-70° 2 $\theta$  value. FT-IR spectra were recorded using Perkin-Elmer instrument spectrum 100 series, using KBr pallet technique over a range of 400-4000 cm<sup>-1</sup>. The TGA were recorded using NETZSCH STA 449 F-3, the sample was heated up to 750°C at the rate 20°C/min. The SEM images were obtained on a JEOL JSM 6380 LA instrument. The SEM image shows the nano composite formation. The CO<sub>2</sub> temperature programmed desorption analysis were performed to evaluate the total basicity of catalyst using Micromeritics (USA), equipped with TCD detector. The N<sub>2</sub> adsorption/desorption isotherm was obtained by using Tri-Star-II 2020 (Micromeritics, USA) instrument, initially sample was degassed for 2 h at 350°C and calculate the surface area pore size distribution.

#### 2. IR of catalysts

##### a. Pure La<sub>2</sub>O<sub>3</sub>

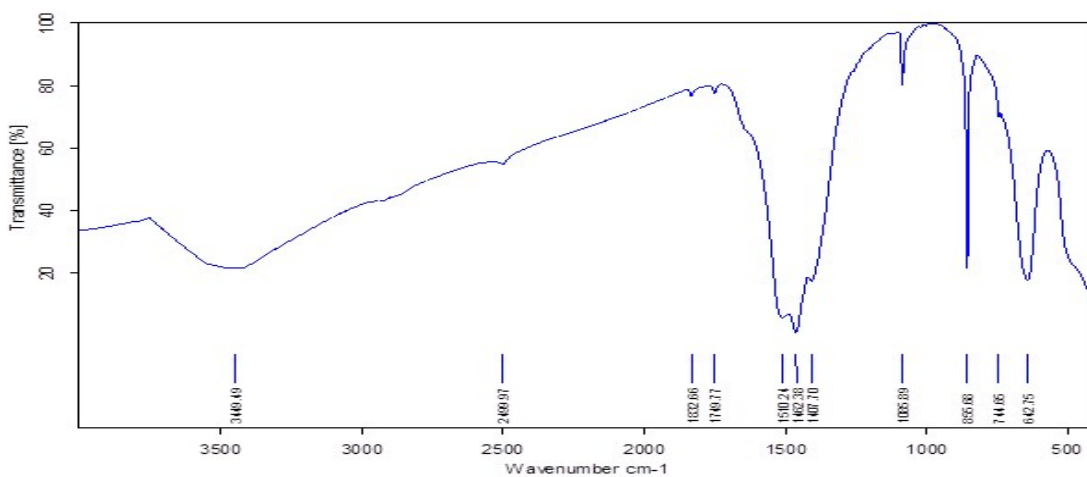

Figure S1: IR spectrum of La<sub>2</sub>O<sub>3</sub>

##### b. Pure MgO

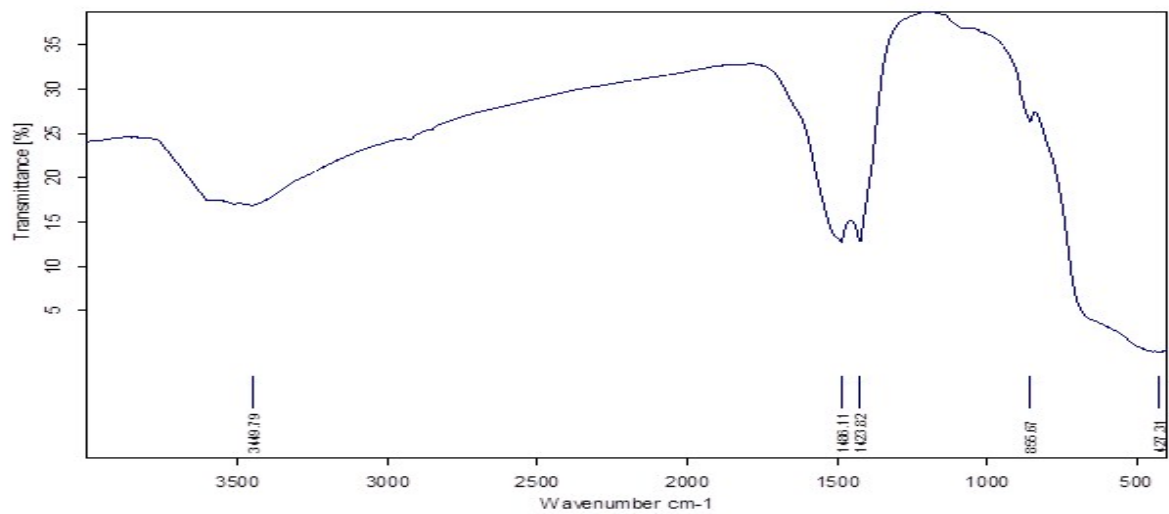

**Figure S2:** IR spectra of pure MgO

### 3. XRD of reused catalyst

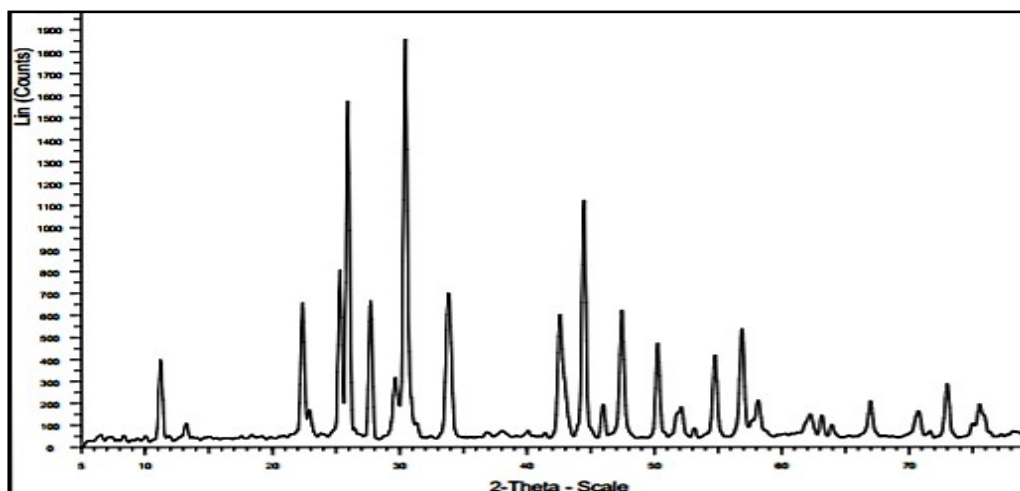

Figure S3: XRD of reused La-Mg MO

### 4. HPLC method for quinazoline-2,4(1H,3H)-dione

The reaction progress as well as purity of quinazolinedione was analyzed by following HPLC method;

|                                                |   |                                                                                                                                 |                |                |
|------------------------------------------------|---|---------------------------------------------------------------------------------------------------------------------------------|----------------|----------------|
| <b>Mobile phase A</b>                          | : | Acetonitrile                                                                                                                    |                |                |
| <b>Mobile phase B</b>                          | : | 0.1% Trifluoroacetic acid (TFA) in deionized water                                                                              |                |                |
| <b>Column used</b>                             | : | Zorbax C18 [4.6 mm (id) x 250 mm (length) x 5 $\mu$ m (particle size)]                                                          |                |                |
| <b>Gradient program</b>                        |   | Time                                                                                                                            | Mobile phase A | Mobile phase B |
|                                                |   | 0                                                                                                                               | 20             | 80             |
|                                                |   | 5                                                                                                                               | 20             | 80             |
|                                                |   | 10                                                                                                                              | 90             | 10             |
|                                                |   | 15                                                                                                                              | 90             | 10             |
|                                                |   | 18                                                                                                                              | 20             | 80             |
|                                                |   | 20                                                                                                                              | 20             | 80             |
| <b>Wavelength (<math>\lambda_{max}</math>)</b> | : | 243nm                                                                                                                           |                |                |
| <b>flow rate</b>                               | : | 1.0 mL/min                                                                                                                      |                |                |
| <b>Diluent</b>                                 | : | Methanol                                                                                                                        |                |                |
| <b>sample preparation</b>                      | : | Calculated amount of sample + add minimum quantity of DMF to solubilize sample, then dilute up to mark with methanol (2000 ppm) |                |                |
| <b>retention time</b>                          | : | 2-aminobenzonitrile 4.2 min and quinazolinedione 10.7 min                                                                       |                |                |

### 5. Characterization of Quinazoline-2,4(1H,3H)-dione derivatives

a) Quinazoline-2,4(1*H*,3*H*)-dione

i. IR spectra

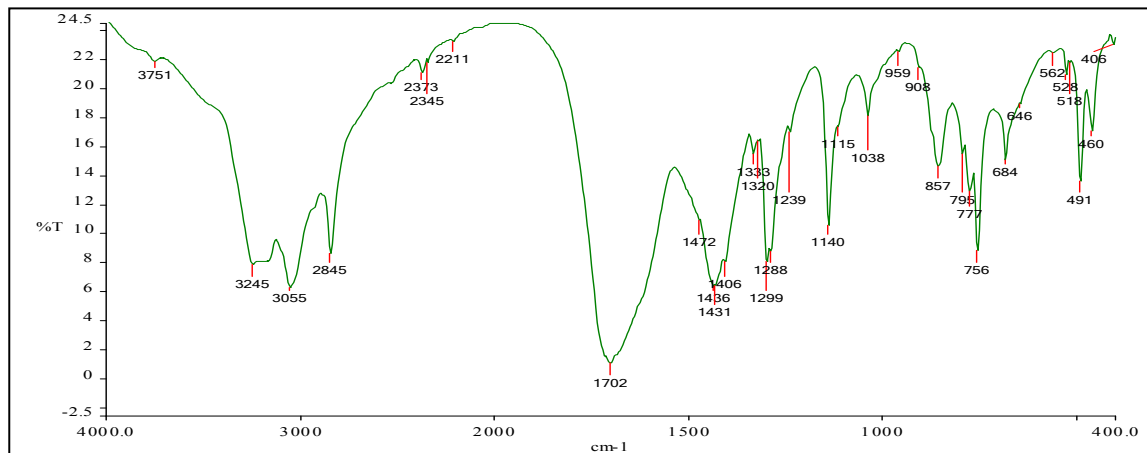

**Figure S4:** FT-IR of Quinazoline-2,4(1*H*,3*H*)-dione

ii. GC-Mass spectra quinazoline-2,4(1*H*,3*H*)-diones

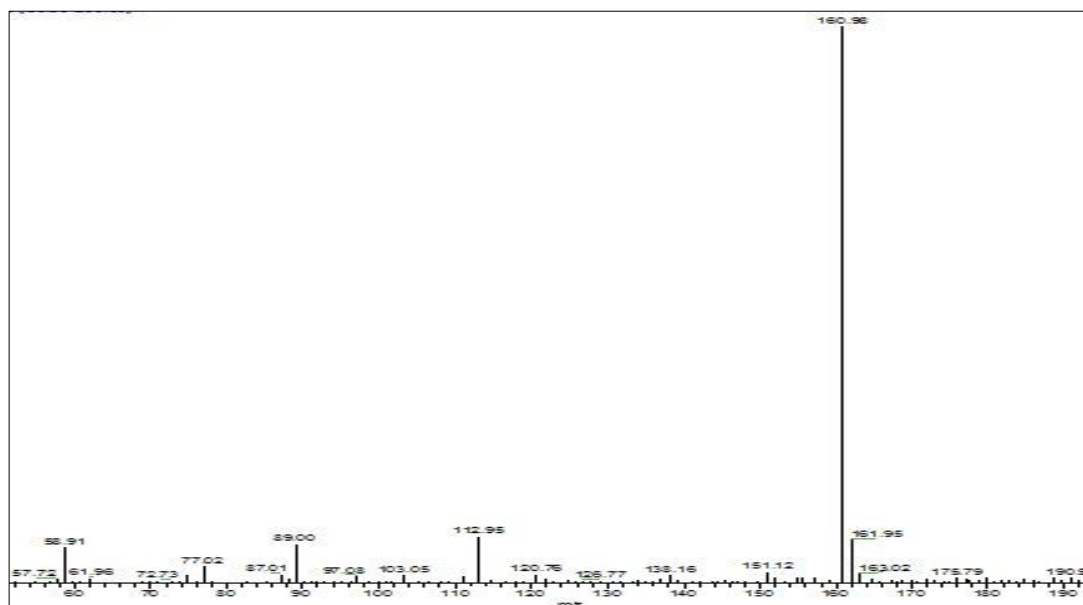

**Figure S5:** GC-MS of Quinazoline-2,4(1*H*,3*H*)-dione

**H-NMR Spectra:** (a) quinazoline-2,4(1*H*,3*H*)-diones

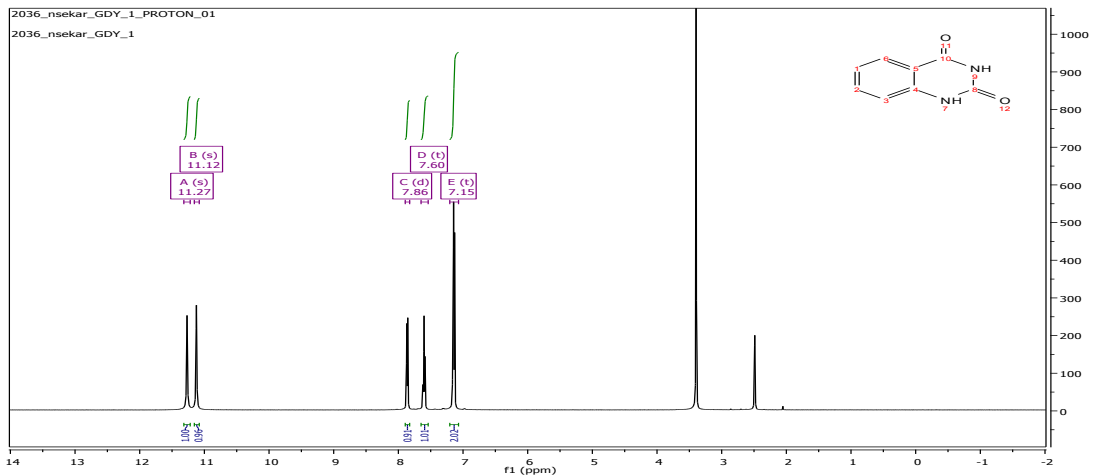

$C^{13}$ -NMR spectra: quinazoline-2,4(1H,3H)-diones

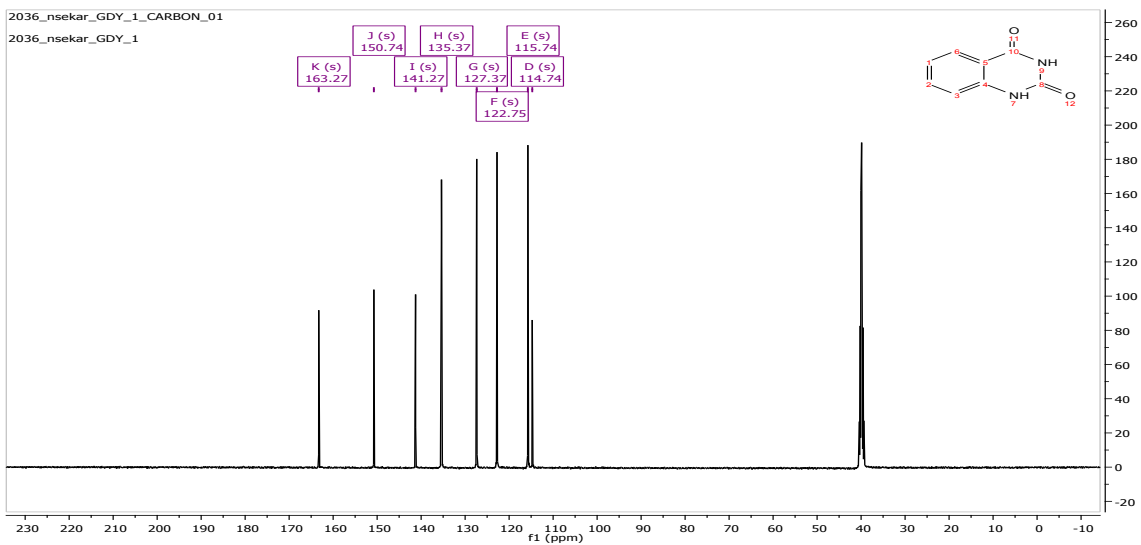

b) 5-chloro quinazoline-2,4(1H,3H)-dione

$^1H$ -NMR

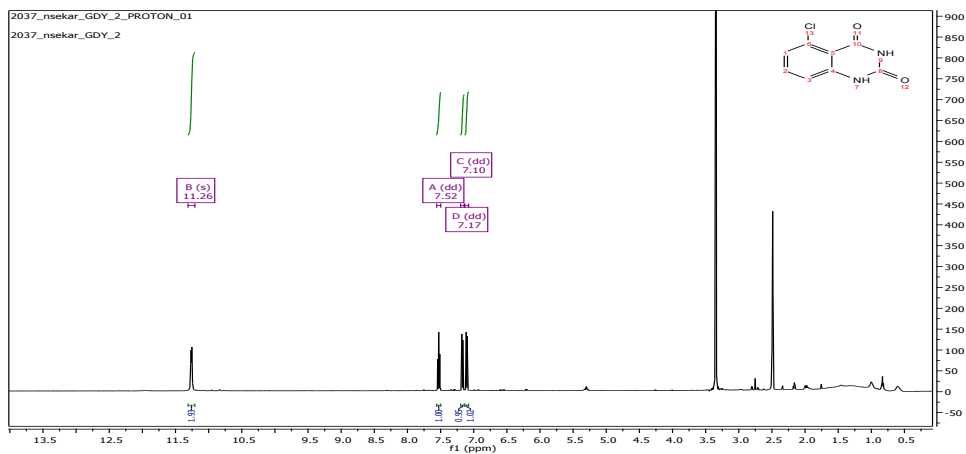

# <sup>13</sup>C-NMR

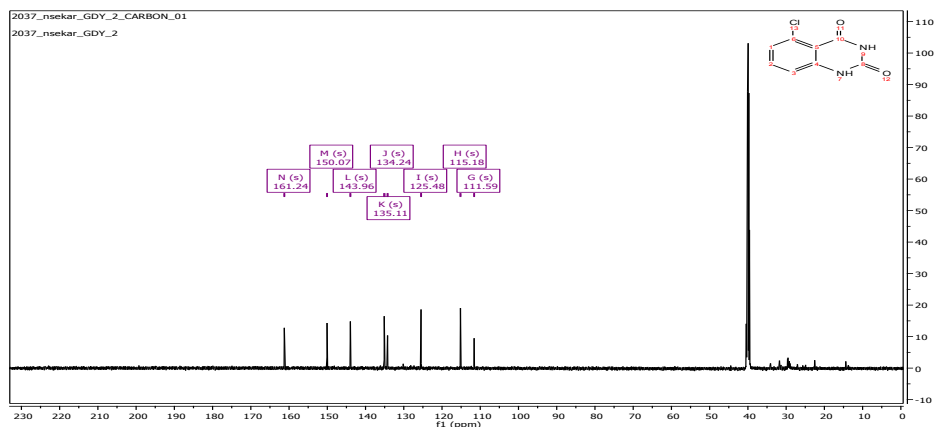

## c) 6-chloro quinazoline-2,4(1*H*,3*H*)-dione

### <sup>1</sup>H-NMR

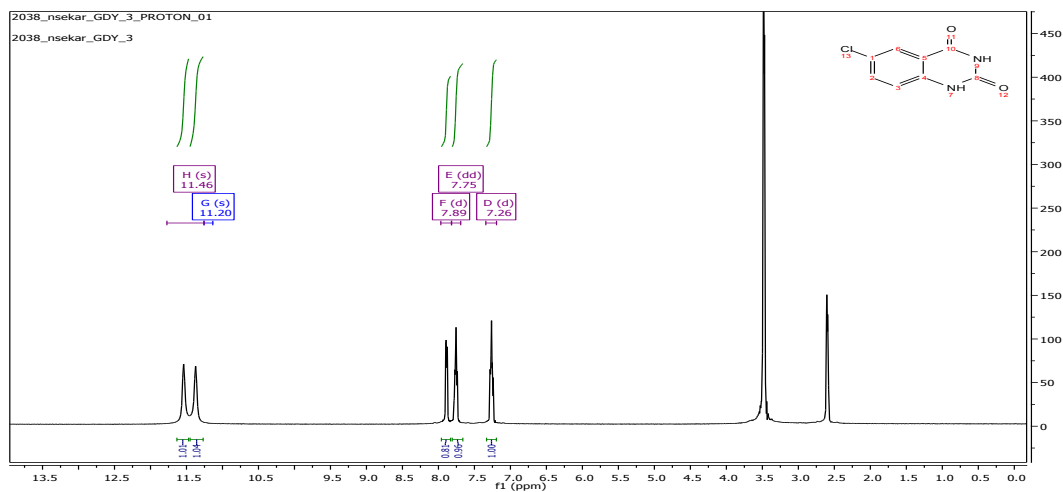

### <sup>13</sup>C NMR

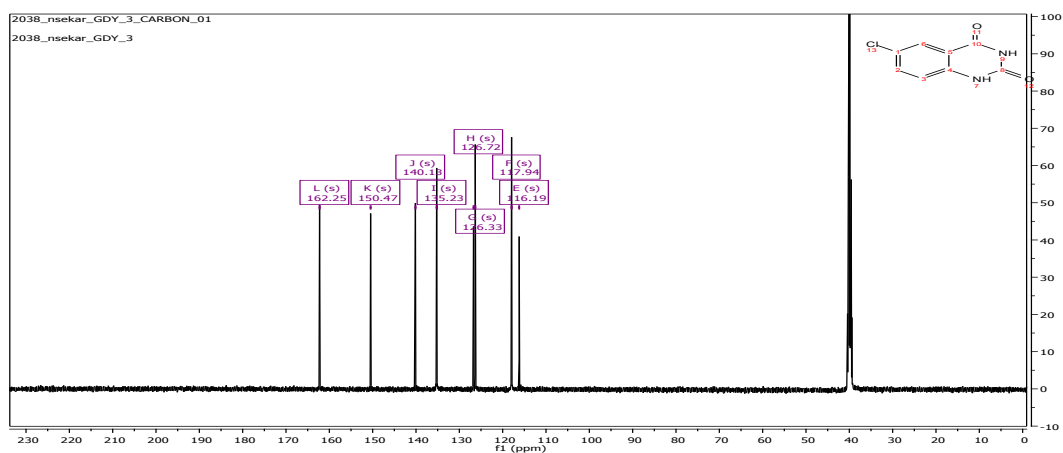

## (d) 7-Methyl quinazoline-2,4(1*H*,3*H*)-dione

# <sup>1</sup>H-NMR

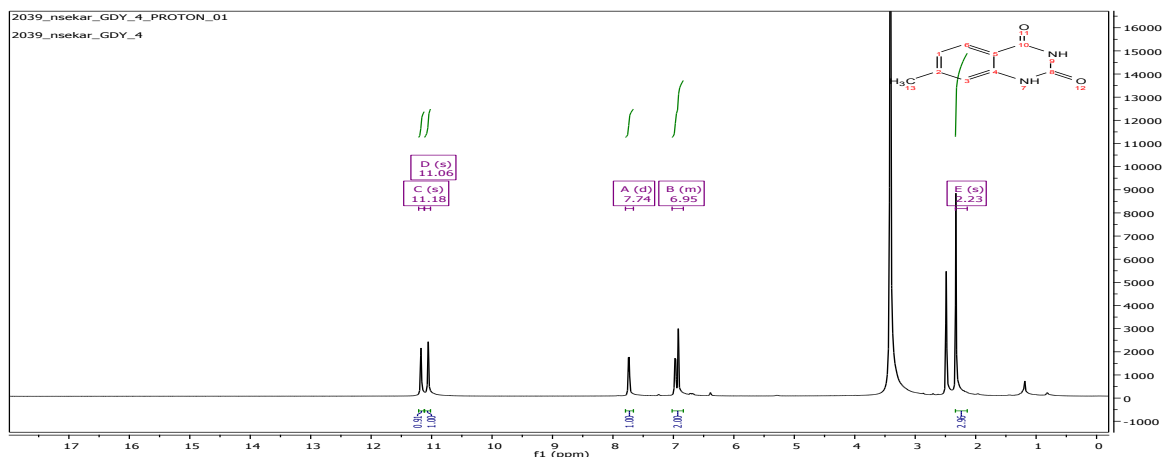

# <sup>13</sup>C-NMR

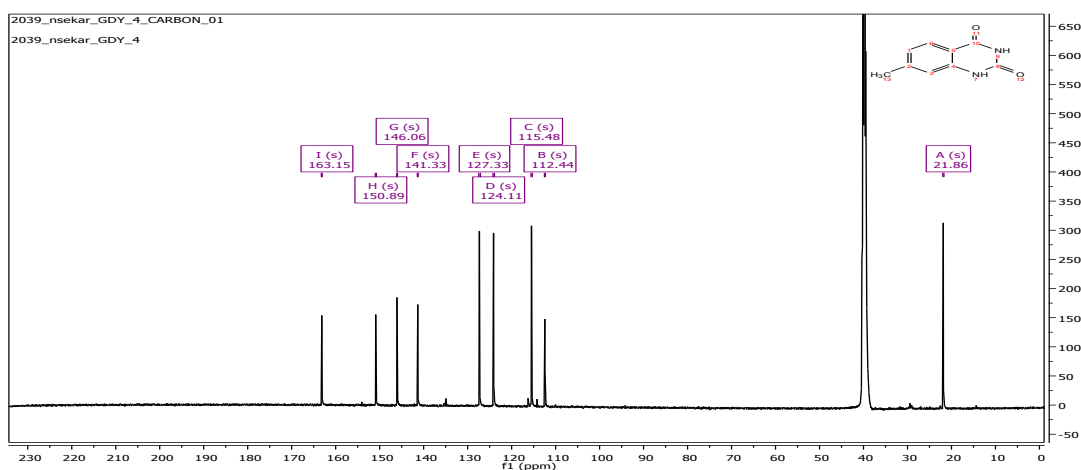

## e) 6,7-Dimethoxy quinazoline-2,4(1H,3H)-dione

# <sup>1</sup>H-NMR

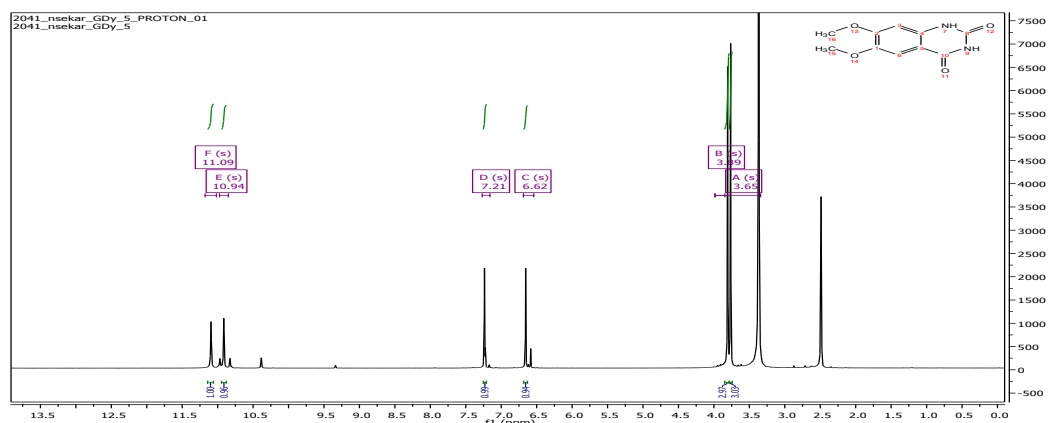

# <sup>13</sup>C-NMR

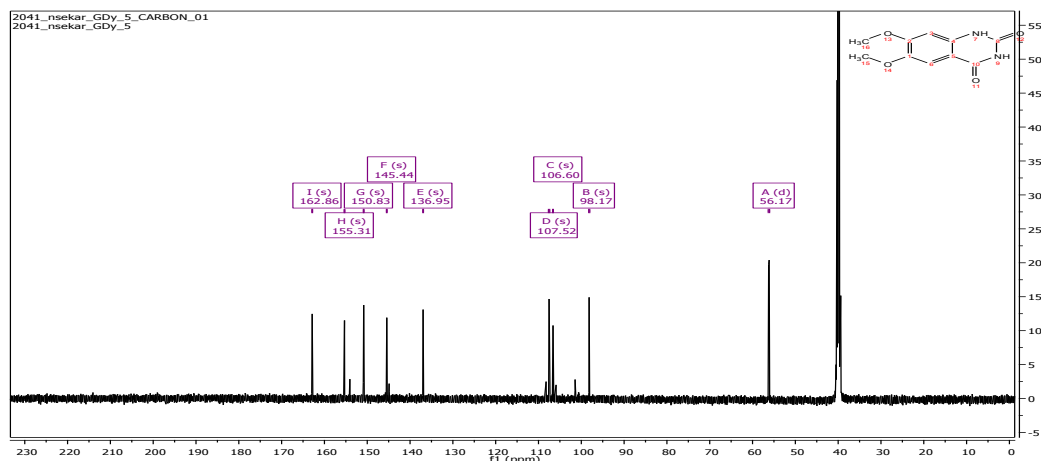

f) 5-Fluoro quinazoline-2,4(1*H*,3*H*)-dione

<sup>1</sup>H-NMR

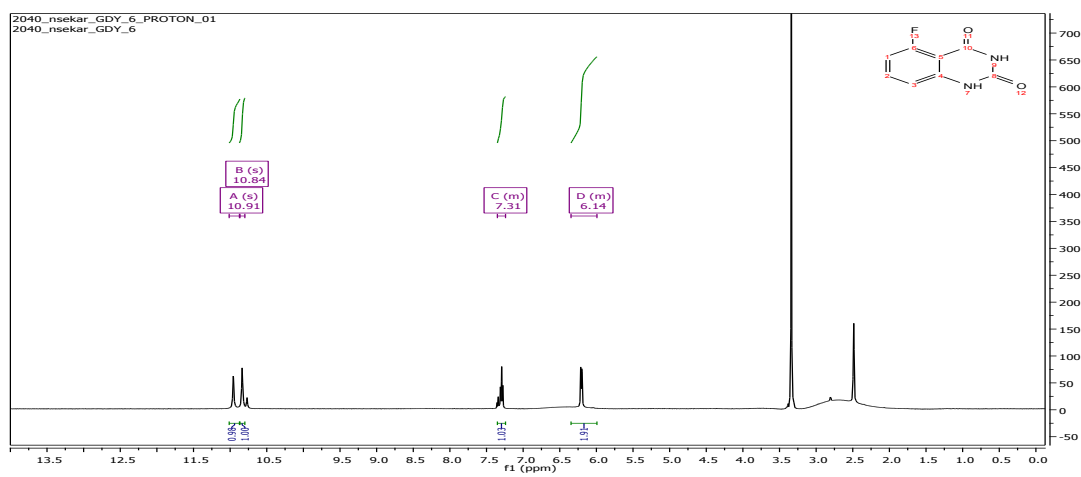

<sup>13</sup>C-NMR

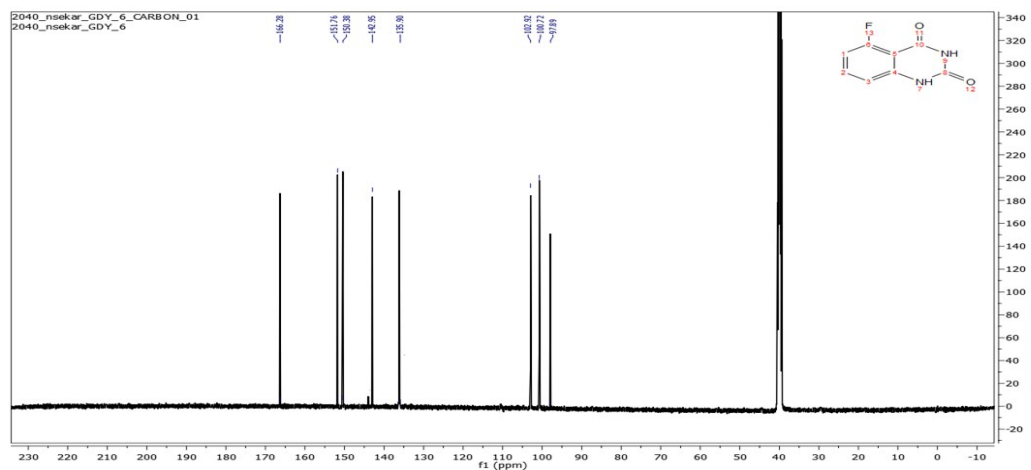

g) 8-Bromo-6-nitro quinazoline-2,4(1*H*,3*H*)-dione



# <sup>1</sup>H-NMR

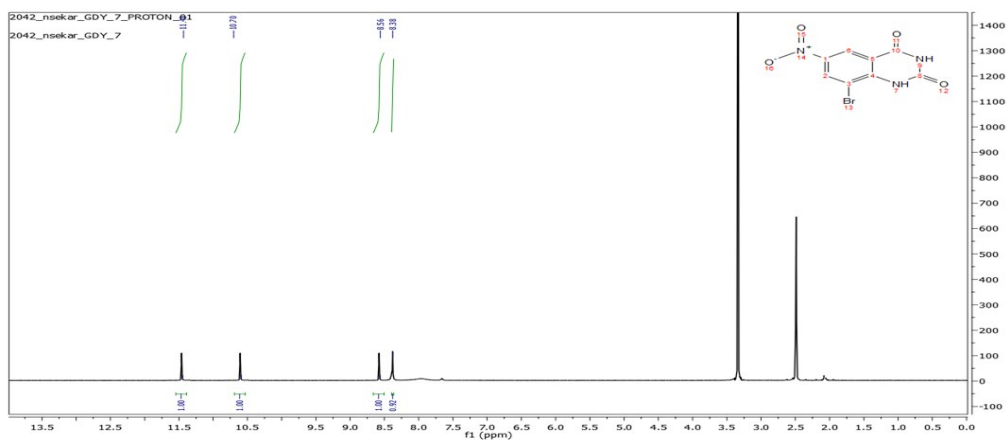

# <sup>13</sup>C-NMR

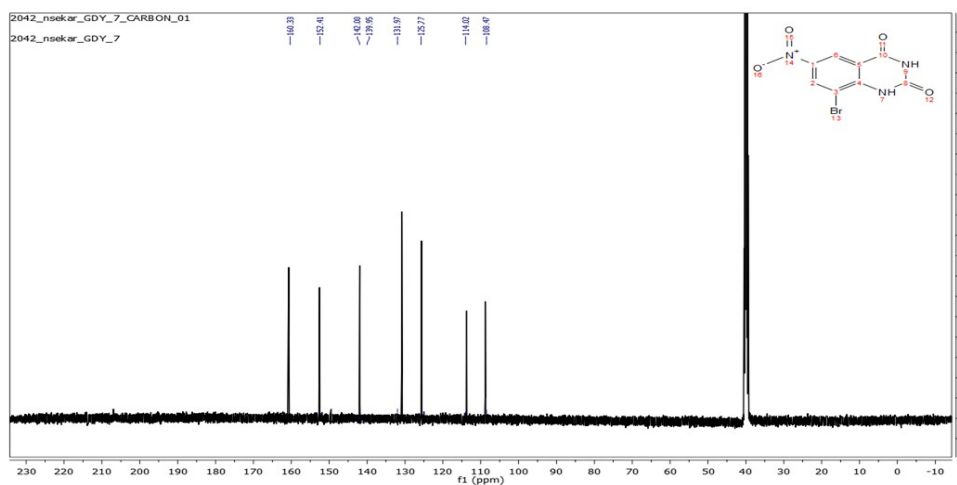

## h) 7-Chloro quinazoline-2,4(1H,3H)-dione

# <sup>1</sup>H-NMR

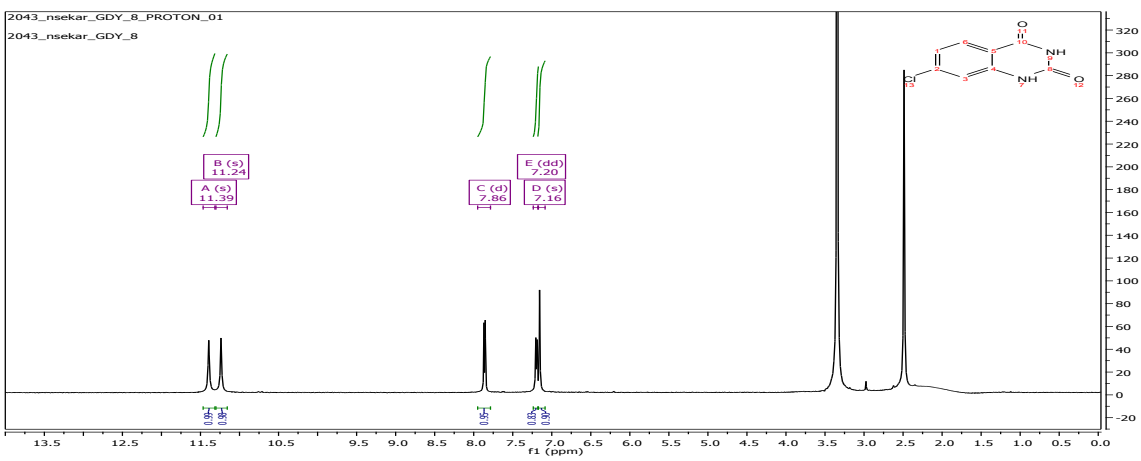

# <sup>13</sup>C-NMR

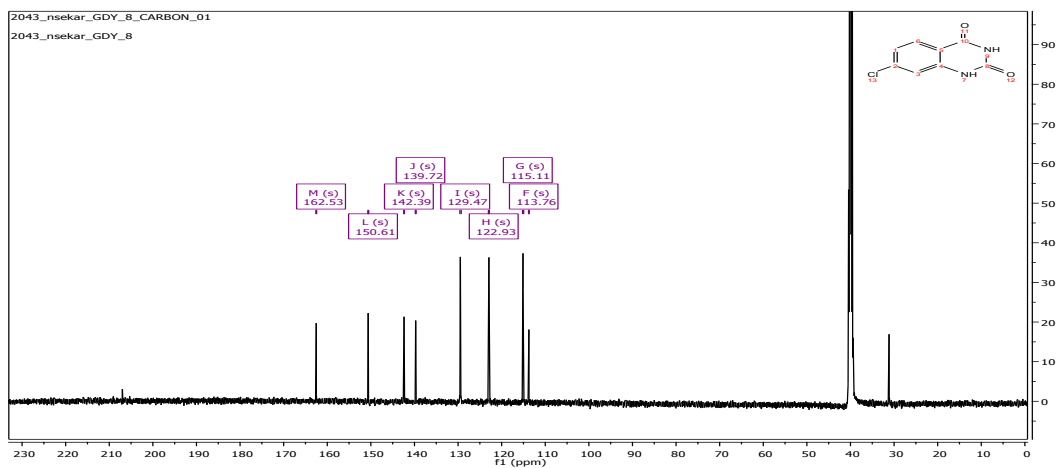

i) 6-Nitro quinazoline-2,4(1*H*,3*H*)-dione

# <sup>1</sup>H-NMR

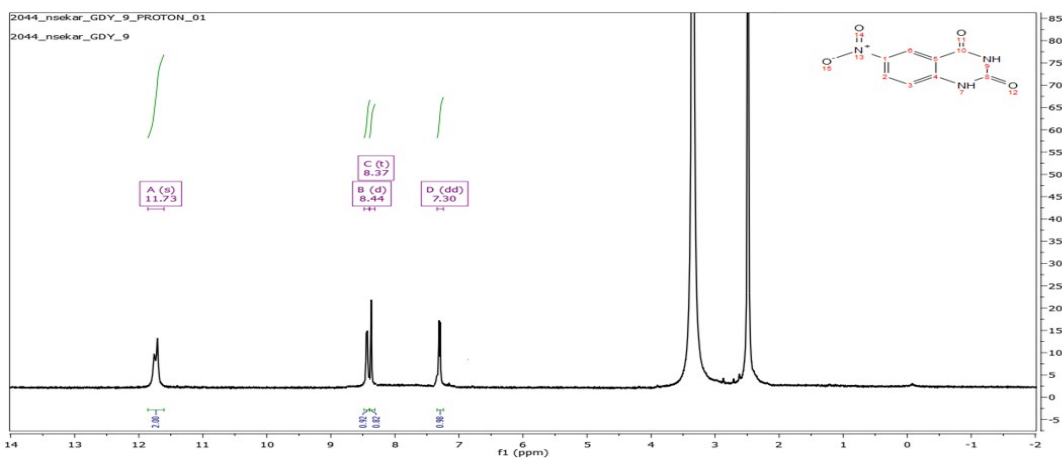

# <sup>13</sup>C-NMR

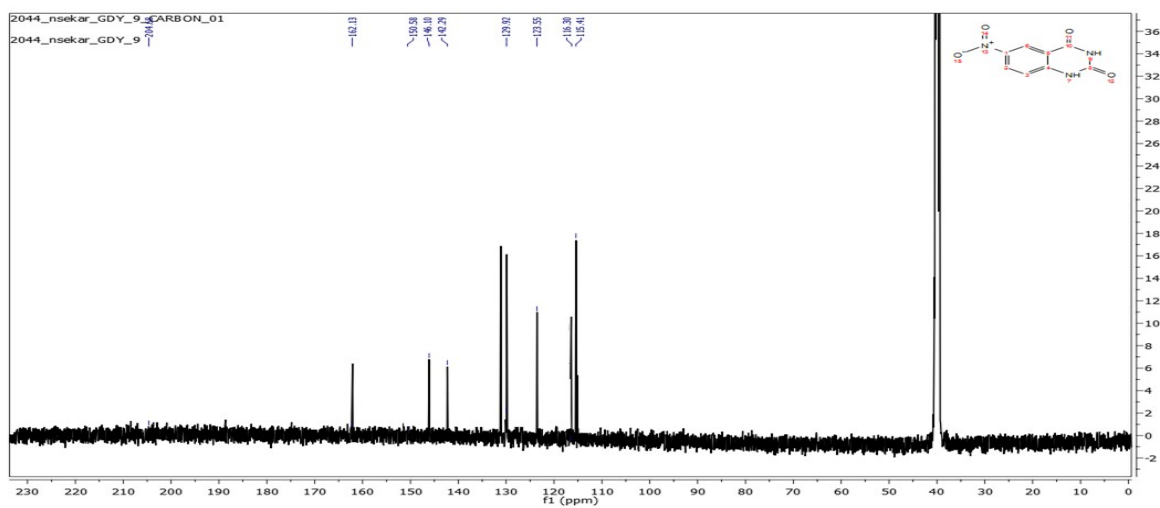

Supplement: c6ra15802a1.pdf [file c6ra15802a1.pdf]
